# Supplementary material
Source: PubMed Central journal article supplement (PMC3837743)
Supplement: AEM.02483-13_zam999104933so1.pdf [file AEM.02483-13_zam999104933so1.pdf]

## Supplementary Material

**TABLE S1. Synthetic oligonucleotide primers used in this study.**

| Primer name                       | Restriction<br>endonuclease | Sequence (5' to 3')                    |
|-----------------------------------|-----------------------------|----------------------------------------|
| chiA-forward                      | <i>Bam</i> H I              | CGCGGATCCGCGGACAGCACCAATTCCTATAAAAG    |
| chiA-reverse                      | <i>Hind</i> III             | GCCCAAGCTTTTACTTTACGCTCCACAGGGAC       |
| chiB-forward                      | <i>Bgl</i> II               | AGAGATCTGCGGCAGTGCCGACGGTGC            |
| chiB-reverse                      | <i>Eco</i> R I              | CGGAATTCTTACTTTACGCTCCACAGGGAC         |
| chiC-forward                      | <i>Xho</i> I                | CCGCTCGAGGCCCGGCTGACGGCTACAAAG         |
| chiC-reverse                      | <i>Eco</i> R I              | CGGAATTCTTAGTTAACCGTTACAGTAACTTC       |
| chiD-forward                      | <i>Xho</i> I                | CCGCTCGAGGCGGCTTCCACCCCTGCGG           |
| chiD-reverse                      | <i>Eco</i> R I              | CGGAATTCCTATTGCAGCGCCCACAATGC          |
| chiE-forward                      | <i>Xho</i> I                | CCGCTCGAGGCAGACCGCGGCGCTTGGG           |
| chiE-reverse                      | <i>Eco</i> R I              | CGGAATTCTTACGGCAATTTTGTCAAGAAAGG       |
| chiF-forward                      | <i>Xho</i> I                | CCGCTCGAGGCAACCGGCTATAAAAATCGTCGGG     |
| chiF-reverse                      | <i>Eco</i> R I              | CGGAATTCTTACGATACGATGGCCCACAG          |
| chiW-full length-forward          | <i>Xho</i> I                | CCGCTCGAGGCAAGCAAGCACATCCGATGTTGAAG    |
| chiW-full length-reverse          | <i>Bgl</i> II               | GCAGATCTTTATTTTCGGCGCTTTCAGTTCG        |
| chiW-ΔSLH-forward                 | <i>Xho</i> I                | CCGCTCGAGGTTATCCTGGATCCTGGATCGGGVTGCAG |
| chiW-1 <sup>st</sup> GH18-forward | <i>Bgl</i> II               | GCAGATCTATTGTTTCTTATATCCCGGCTTGG       |
| chiW-1 <sup>st</sup> GH18-reverse | <i>Hind</i> III             | CCCAAGCTTTTAGTCCTGGCTGTATTCCCAATAT     |
| chiW-2 <sup>nd</sup> GH18-forward | <i>Bgl</i> II               | GAAGATCTGGTTAGTACCGGGGTGG              |
| chiW-2 <sup>nd</sup> GH18-reverse | <i>Hind</i> III             | CCCAAGCTTCTAGTCTTGGCTATAATCCAG         |

The primers were designed according to the sequence of each chitinase gene and contained modifications to add appropriate restriction endonuclease recognition sites for insertion into the vector. Restriction endonuclease recognition sequences are indicated by underline.

**TABLE S2. Bacterial properties of FPU-7**

---

|                                            |                                                                                          |
|--------------------------------------------|------------------------------------------------------------------------------------------|
| Cell shape                                 | Rod-shaped flagellate bacillus-like bacteria                                             |
| Size (µm)                                  | 0.5 x 2.0                                                                                |
| Motility <sup>a</sup>                      | +                                                                                        |
| Gram staining <sup>a</sup>                 | +                                                                                        |
| Spore forming <sup>a</sup>                 | +                                                                                        |
| Catalase activity <sup>a</sup>             | +                                                                                        |
| Oxidase activity <sup>a</sup>              | +: glucose, maltose, sucrose, gelatin<br>-: galactitol, inulin, glycerol, ribose, xylose |
| β-Galactosidase activity <sup>a</sup>      | +                                                                                        |
| Arginine dihydrolase activity <sup>a</sup> | +                                                                                        |
| Aerobic condition <sup>a</sup>             | +                                                                                        |
| Anaerobic condition <sup>a</sup>           | +                                                                                        |
| Growth temperature                         | < 55°C                                                                                   |
| Pathogenicity                              | N.D. <sup>b</sup>                                                                        |

---

<sup>a</sup> + : Positive, - : Negative

<sup>b</sup> N.D.: Not detected.
